# Supplementary material
Source: PubMed Central journal article supplement (PMC7978491)
Supplement: NIHMS1679263-supplement-Supplementary_material.pdf [file NIHMS1679263-supplement-Supplementary_material.pdf]

Supporting Information for Robust Inference for the Stepped Wedge Design by Hughes,  
Heagerty, Xia and Ren.

Table Web 1: Chlamydia prevalence in women in sentinel sites aggregated by local health jurisdiction (LHJ) and time, from the Washington state EPT trial. The intervention was initiated on 10/1/07 for wave 1 (LHJs 1 - 6), 6/1/08 for wave 2 (LHJs 7 - 12), 1/15/09 for wave 3 (LHJs 13 - 18) and 8/1/09 for wave 4 (LHJs 19 - 22); chlamydia prevalence was assessed during the last 3 months of each interval. Shaded areas indicate the times when the intervention was provided.

| LHJ | Time                |                     |                       |                     |                     |
|-----|---------------------|---------------------|-----------------------|---------------------|---------------------|
|     | 7/1/07 -<br>9/30/07 | 3/1/08 -<br>5/31/08 | 10/15/08 -<br>1/14/09 | 5/1/09 -<br>7/31/09 | 6/1/10 -<br>8/31/10 |
| 1   | 0.10                | 0.07                | 0.07                  | 0.07                | 0.09                |
| 2   | 0.08                | 0.06                | 0.04                  | 0.06                | 0.06                |
| 3   | 0.23                | 0.13                | 0.04                  | 0.04                | 0.06                |
| 4   | 0.05                | 0.06                | 0.05                  | 0.05                | 0.06                |
| 5   | 0.03                | 0.07                | 0.06                  | 0.02                | 0.08                |
| 6   | 0.04                | 0.05                | 0.07                  | 0.04                | 0.05                |
| 7   | 0.09                | 0.13                | 0.10                  | 0.10                | 0.12                |
| 8   | 0.11                | 0.10                | 0.10                  | 0.07                | 0.08                |
| 9   | 0.04                | 0.03                | 0.05                  | 0.04                | 0.08                |
| 10  | 0.04                | 0.07                | 0.03                  | 0.04                | 0.06                |
| 11  | 0.02                | 0.07                | 0.05                  | 0.06                | 0.02                |
| 12  | 0.09                | 0.09                | 0.09                  | 0.11                | 0.05                |
| 13  | 0.12                | 0.06                | 0.07                  | 0.06                | 0.06                |
| 14  | 0.05                | 0.09                | 0.07                  | 0.05                | 0.04                |
| 15  | 0.12                | 0.07                | 0.10                  | 0.07                | 0.05                |
| 16  | 0.18                | 0.10                | 0.08                  | 0.07                | 0.12                |
| 17  | 0.06                | 0.14                | 0.10                  | 0.06                | 0.07                |
| 18  | 0.08                | 0.07                | 0.15                  | 0.08                | 0.10                |
| 19  | 0.09                | 0.10                | 0.07                  | 0.05                | 0.05                |
| 20  | 0.04                | 0.05                | 0.17                  | 0.12                | 0.02                |
| 21  | 0.11                | 0.07                | 0.06                  | 0.06                | 0.08                |
| 22  | 0.06                | 0.05                | 0.04                  | 0.04                | 0.05                |

Table Web 2: Sample size for the chlamydia outcome by local health jurisdiction (LHJ) and time, from the Washington state EPT trial.

| LHJ | Time                |                     |                       |                     |                     |
|-----|---------------------|---------------------|-----------------------|---------------------|---------------------|
|     | 7/1/07 -<br>9/30/07 | 3/1/08 -<br>5/31/08 | 10/15/08 -<br>1/14/09 | 5/1/09 -<br>7/31/09 | 6/1/10 -<br>8/31/10 |
| 1   | 608                 | 787                 | 1075                  | 1553                | 1370                |
| 2   | 374                 | 482                 | 591                   | 616                 | 557                 |
| 3   | 26                  | 67                  | 115                   | 174                 | 94                  |
| 4   | 493                 | 590                 | 532                   | 785                 | 961                 |
| 5   | 64                  | 261                 | 176                   | 133                 | 90                  |
| 6   | 45                  | 212                 | 199                   | 79                  | 131                 |
| 7   | 359                 | 396                 | 329                   | 397                 | 354                 |
| 8   | 168                 | 272                 | 396                   | 476                 | 423                 |
| 9   | 221                 | 270                 | 276                   | 356                 | 225                 |
| 10  | 26                  | 44                  | 65                    | 83                  | 96                  |
| 11  | 48                  | 67                  | 73                    | 120                 | 166                 |
| 12  | 231                 | 318                 | 293                   | 305                 | 352                 |
| 13  | 333                 | 848                 | 1189                  | 1325                | 1050                |
| 14  | 135                 | 223                 | 250                   | 382                 | 855                 |
| 15  | 117                 | 132                 | 129                   | 224                 | 316                 |
| 16  | 17                  | 58                  | 79                    | 99                  | 59                  |
| 17  | 49                  | 44                  | 51                    | 83                  | 54                  |
| 18  | 36                  | 57                  | 62                    | 79                  | 131                 |
| 19  | 421                 | 568                 | 550                   | 844                 | 1050                |
| 20  | 78                  | 58                  | 41                    | 52                  | 48                  |
| 21  | 19                  | 59                  | 109                   | 122                 | 101                 |
| 22  | 77                  | 78                  | 94                    | 122                 | 133                 |
